# Supplementary material
Source: PubMed Central journal article supplement (PMC3719544)
Supplement: JB.02148-12_zjb999092700so1.pdf [file JB.02148-12_zjb999092700so1.pdf]

## SUPPLEMENTAL MATERIAL

Michalowski and Little – “Role of *cis*-acting sites in stimulation of the phage  $\lambda$   $P_{RM}$  promoter by CI-mediated looping”

### A. Plasmids

#### A.1. Plasmids with *lacO* / $P_L$

**pJWL334** (1) was used as cloning vector for most plasmids used in phage-by-plasmid crosses. It carries a multiple cloning site followed by a strong *trp a* terminator. We found that plasmids carrying the  $O_L$  region cloned into the multiple cloning site must be maintained in a host making CI (or Lac repressor in the case of pJWL808), presumably because high-level expression of  $P_L$  is toxic, despite the presence of the *trp a* terminator downstream of  $P_L$ . In contrast, plasmids with  $P_R$  oriented towards *trp a*, such as pJWL631, do not require presence of CI for maintenance.

**pJWL808** -- this was made in several steps (not described), and used (but not named) in (2). It contains  $\lambda$  DNA (3) from  $\lambda$  nucleotides 35285 (early in the *N* gene) to 35939 (late in the *rexB* gene);  $\lambda$  residues 35555-35586 are replaced with the sequence GCATGCAATTGTGAGCGGATAACAATTCGTT, which includes *lacO* (underlined). This segment is cloned into pJWL334, with  $P_L$  oriented towards *trp a*.

#### A.2. Plasmids used for construction of phages altered in the $O_L$ region

**pJWL1293** -- this plasmid carries the wild-type  $O_L$  region DNA from positions 35357 to 35872. It was isolated by PCR using primers bamrexb and oLKpn with  $\lambda$ JL163 as template, digestion with BamHI and KpnI, ligation into pJWL334 cut with the same enzymes, and transformation into strain JL9058.  $P_L$  is oriented towards *trp a*; pJWL1293, pJWL1294 and pJWL1295 (see below) were maintained in a host producing CI. pJWL1293 was used as an  $O_L^+$  control in phage-by-plasmid crosses (section B.2) with  $\lambda$ JL481 and  $\lambda$ JL483.

**pJWL1294** – Site-directed mutagenesis (SDM) was done as described (4), using primers IHF80for and 79mutrev and pJWL1293 as template, introducing the *IHFmut* mutation.

**pJWL1295** -- as pJWL1294, using primers 105for and 85rev, introducing the  $\Delta UP$  mutation.

#### A.3. Plasmids used for construction of reporters with changes in the $O_L$ region

Plasmids were made with variants of the  $O_L$  region located distal to *lacZ* (Fig. S1 in (5)). These were derived from pJWL1157 and pJWL1158 (Table S1), which include the wild-type  $O_L$

region and its  $O_L3-4$  derivative, respectively. Primers for SDM and resulting genotypes are listed in Table S2. Presence of the desired sequence was verified by DNA sequencing.

#### A. 4. Other plasmids

**pJWL521:** This was made in several steps (not described). It carries a promoterless, truncated *cI* gene from residues ~37925 to 37459 (amino acids 5 to 160) and the *cI857* allele (A66T).

### B. Phage Strains

#### B.1. Selection for phages with altered $O_L$ regions--approach

We developed a selection for phage recombinants, arising from phage-by-plasmid crosses, that carry the plasmid-borne  $O_L$  region (Fig. S2). This selection should be of general use for this purpose. The parental phage (section B.1.a. below) carries a *lac* operator located just after the start of  $P_L$  (2), in the same location, at +5 to +25 relative to the  $P_L$  start site, as in the natural *lac* promoter. On strain JL6142, with no Lac repressor, this phage forms turbid plaques resembling those of wild-type  $\lambda$ . The *lacO* /  $P_L$  phage cannot grow in the presence of Lac repressor, affording a selection for recombinants that had lost the *lacO* allele, termed LacI<sup>R</sup>. In the crosses described here, the desired recombinants exhibited an altered plaque morphology, but this feature is not required for the isolation of  $O_L$  variants, since DNA sequencing of LacI<sup>R</sup> recombinants provides a secondary screen for the genotype.

The *lacO* /  $P_L$  phages with  $P_{RM}^+$  or *prm240* were crossed with plasmids carrying the  $O_L$  region with *IHFmut* or  $\Delta UP$ , and cross progeny were plated on strain JL7937, which produces a high level of Lac repressor. In crosses with a control  $O_L^+$  plasmid, the resulting LacI<sup>R</sup> plaques, which should be genetically wild-type, were of uniform morphology, with the same appearance as plaques of wild-type  $\lambda$ . LacI<sup>R</sup> phages produced in crosses with the *IHFmut* and  $\Delta UP$  plasmids yielded a mixture of plaque morphologies. When the parental phage was  $P_{RM}^+$ , about 1/3 of the plaques resembled wild-type, while about 2/3 were about the same size but somewhat less turbid than the wild-type. When the parental phage was *prm240*, recombinants made nearly clear plaques. The less-turbid plaque-formers were found by DNA sequencing to carry the *IHFmut* or  $\Delta UP$  alleles.

##### B.1.a. Phages with *lacO* / $P_L$

**$\lambda$ JL489** --  $\lambda$ JL537 *v2 v1 v3* was crossed with pJWL808 in strain JL7209. Non-virulent phage recombinants, which had lost the  $O_L1$  allele *v2* by recombination with the plasmid, were

identified by plating on a mixed indicator, consisting of JL2497 and JL5895, as described (5) and screening for turbid plaques. The top agar contained 0.2 ml 0.1 M IPTG, which induced CI expression in strain JL5895 and allowed growth of the *lacO*-bearing recombinants in JL2497. Turbid plaques were screened for inability to grow in JL2497 in the absence of IPTG. Presence of *lacO* was verified by DNA sequencing. Plaques are clear on JL6142 or on JL2497 with IPTG, because the *v1* and *v3* mutations in  $O_R$  prevent repression of  $P_R$  by CI.

**λJL481** -- λJL489 was crossed with pJWL631 (5), which is  $O_R^+$ , with 0.2 ml 0.1 M IPTG in the top agar. Cross progeny were plated on JL2497 with 0.2 ml 0.1 M IPTG in the top agar; phages forming turbid plaques were isolated. Presence of  $O_R^+$  was verified by DNA sequencing.

**λJL483** -- isolated as λJL481, except that cross was with pJWL487 (5), carrying *prm240*.

## **B.2. Phages with altered $O_L$ regions**

Strains JL9114, JL9115 and JL9116 (carrying plasmids with  $O_L^+$ , *IHFmut* and  $\Delta UP$ , respectively) were grown in LBMM1 + 1 mM IPTG at 30° C. IPTG induced expression of the thermolabile *CI857ts* repressor from pJWL327, affording repression of  $P_L$  on the respective plasmids at 30° C. Cells were grown to  $2 \times 10^8$  / ml, concentrated 10-fold by centrifugation, and infected at low moi with λJL481 or λJL483 for 20 min at room temperature. Cells were diluted into LBGM1 at 40° C; cultures were shaken 90 min and treated with chloroform. Lysates were plated on JL7937, and the resulting  $P_{RM}^+$  LacI<sup>R</sup> phage, **λJL1646** *IHFmut* and **λJL1647**  $\Delta UP$ , were characterized as described in Section C below.

Versions carrying *cI857* were isolated by crossing λJL163 with pJWL326 or by crossing λJL1646 or λJL1647 with pJWL521. Crosses were done at 37° C, followed by plating at 40° C. Large clear plaques were isolated and tested for formation of turbid plaques at 30° C; presence of *cI857* was verified by sequencing, yielding **λJL1383**, **λJL1680** and **λJL1682**, respectively.

## **B.3. Reporter phages carrying $P_{RM}::lacZ$ protein fusions**

These were made in three steps as described ((5), see Supplemental Material), using one of eight plasmids (see Table S2). Intermediate phages are listed in Table S2; the final constructs are listed in Table S3. The structure of these phages is as shown in (5). Plaque color was assessed by plating with 0.05 ml 2% Xgal in the top agar (“Xgal plates”). First, λJL301 (1) was crossed with cells carrying one of the plasmids indicated in the fourth column; white plaques on Xgal plates were isolated, and the desired recombinants were identified by PCR (1), yielding the

promoter-less reporter phages listed in the fifth column. Presence of the  $O_L$  allele was verified by DNA sequencing. Second, these phages were crossed with pJWL479, and recombinants forming dark blue plaques on Xgal plates were isolated, yielding the strains listed in the sixth column. Third, these phages were crossed with pJWL474, pJWL337, pJWL1189 or pJWL1190, which are  $P_{RM}^+$ ,  $prm240$ ,  $P_{RM}^+ O_{R3} r1$ , or  $prm240 O_{R3} r1$ , respectively; pale blue or white plaques on Xgal plates were isolated, giving the set of phages listed in Table S3. Presence of the  $O_R$  alleles was verified by DNA sequencing in each case. Note that pJWL1189 was also used in this step in the previous study (5), not pJWL488 as was indicated in (5).

### C. Pleiotropic effects of *IHFmut* and *ΔUP* mutations on phage physiology

We tested the effects of *IHFmut* and *ΔUP* on several aspects of phage physiology. Both mutations caused mild defects in burst size and lysogenization frequency in the wild-type host in rich medium. The burst sizes of  $\lambda$  wild-type,  $\lambda$  *IHFmut* and  $\lambda$  *ΔUP* after single infection were about 180, 120 and 90, respectively. Lysogenization frequencies after multiple infection were about 70%, 60% and 50%, respectively.  $\lambda$  *prm240 IHFmut* and  $\lambda$  *prm240 ΔUP* were unable to lysogenize, as expected, since they should make less CI than  $\lambda$  *prm240*, for which lysogens are barely stable due to low CI levels (5). They were not further characterized.

Lysogens of  $\lambda$ JL1646 *IHFmut* and  $\lambda$ JL1647 *ΔUP* produced very low yields upon UV induction (Fig. S3). This defect might result from defects in inactivating CI by specific cleavage. Alternatively, it might result from a defect in expression of one or more functions required for prophage excision, since this is the main aspect of the induction pathway not shared with lytic growth after infection, which was almost normal (see above).

To test whether the induction defect resulted from a failure to inactivate CI by cleavage, we inactivated CI using a temperature-sensitive mutant CI. We made derivatives of these phages carrying the *cI857ts* allele ( $\lambda$ JL1383,  $\lambda$ JL1680 and  $\lambda$ JL1682), and carried out thermal induction of lysogens. Again, both mutants had a reduced burst size, yielding about 40 and 25 phage per cell for  $\lambda$  *cI857 IHFmut* and  $\lambda$  *cI857 ΔUP*, respectively, compared to 150 for the  $\lambda$  *cI857* lysogen. Although these defects are not as severe as in the case of UV induction, this finding suggests that the defect after UV induction does not result entirely from failure to inactivate CI.

If *IHFmut* or *ΔUP* weaken  $P_L$ , levels of Int or Xis proteins may not suffice to support prophage excision. When we provided Int protein *in trans* from a plasmid carrying an IPTG-

inducible *int* gene, the growth defect after prophage induction was partially suppressed (Fig. S4). Provision of Int also partially suppressed the induction defect of *cI857ts* derivatives (not shown).

When these mutants were plated at 30° C, they formed small plaques on a *recA*<sup>+</sup> host. On a *recA*<sup>-</sup> host, plaques were small on tryptone plates; on M9 minimal plates they were tiny and took two days to form. Inability to form plaques on a *recA*<sup>-</sup> host (the Fec phenotype (6)) is thought to arise from a defect in the *gam* gene, leading to a requirement for RecA-dependent recombination to generate packageable DNA (7). Perhaps expression of Gam function was defective in the mutants. In any case, this property afforded a selection for variants able to form plaques in one day. Sequencing of the *O*<sub>L</sub> and *O*<sub>R</sub> regions, and the *cro* gene, identified mutations in several loci. These included many in *O*<sub>L</sub>1 and *O*<sub>L</sub>2; in the Shine-Dalgarno sequence of *cro*; a mutation termed *cro-z8* in the *cro* 5'UTR that reduces Cro expression (5); and several mutations in the *cro* gene. The mutations in *O*<sub>L</sub>1 and *O*<sub>L</sub>2 are known from analysis of changes in *O*<sub>R</sub>1 (8) to weaken Cro binding in the context of *O*<sub>R</sub>1. A similar distribution of suppressors was seen for  $\lambda$  *IHFmut* and  $\lambda$   *$\Delta$ UP*, suggesting that both mutants are defective in the same process. We surmise that these variants can grow because repression of *P*<sub>L</sub> by Cro is weaker than in the parental phages, allowing increased expression of the *gam* gene.

#### **D. Selection and screen for mutants defective in looping-mediated stimulation**

The *prm240* promoter is markedly stimulated by looping between *O*<sub>L</sub> and *O*<sub>R</sub> (5). In addition, lysogens of  $\lambda$ *prm240* are barely stable in rich medium, but more stable in minimal medium. We reasoned that, if looping stimulates *P*<sub>RM</sub> through the action of *cis*-acting sites in the *O*<sub>L</sub> region, then lysogens of mutants defective in such sites would be destabilized, and that when such mutants arose the cells would eventually release them as free phage. This approach should identify any relevant *cis*-acting sites, whether or not these had been identified by sequence analysis or genetic analysis. The region between *O*<sub>L</sub> and *T*<sub>imm</sub> is highly conserved among a family of wild phages with  $\lambda$  immunity specificity (9), suggesting that other functional sites might lie in this region. To test this prediction, we grew lysogens of strain JL6112 *recA*<sup>-</sup> ( $\lambda$ *prm240*) under conditions (M9 minimal medium at 30° C) that yield a very low level of free phage. Typically, at cell densities of 1-2 x 10<sup>8</sup>, free phage are present in such cultures at roughly

$10^3$ /ml; destabilizing mutants should be enriched in the free phage population, which could be analyzed in a secondary screen based on plaque phenotype.

$\lambda_{prm240}$  forms turbid plaques indistinguishable from those of WT (5), but we expected that the desired mutants would form plaques less turbid than those of  $\lambda_{prm240}$ . In an initial screen, free phage from five independent cultures were plated on JL2497 on tryptone plates at 37° C. A range of plaque morphologies was seen. Sequencing of the  $O_L$  region, the  $O_R$  region, and part of the  $cI$  gene showed that isolates forming clear plaques generally had mutations in  $cI$ . Several isolates forming plaques less turbid than the majority type had a mutation in  $O_L2$ . We reasoned that an  $O_L2$  mutant would not be able to support CI-mediated looping. Among many more isolates with the less-turbid plaque phenotype shown by  $\lambda_{prm240} O_L2^-$ , nearly all had changes in  $O_L2$ . Aside from one isolate with a change that affects  $P_{RM}$  and  $O_R3$ , we did not identify any mutations in *cis*-acting sites other than the  $O_L$  operators.

Two different properties of the *IHFmut* or  $\Delta UP$  mutants would each suffice to make this approach fail. Both the defect in prophage induction (Fig. S4) and formation of very tiny plaques on M9 at 30° C suggest that the burst size of these mutants, should they arise, would be very low, reducing the likelihood of their detection in the “enriched” population of free phage.

### E. $K_B$ model – Calculation of relative activity for templates that can loop

We consider the following model for the action of the UP element, simplified from Fig. 8 (Main Text) by omission of parallel forms:

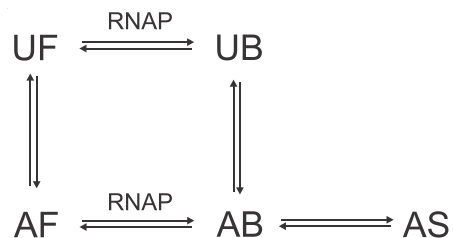

According to the  $K_B$  model (see Main Text), the UP element operates by stabilizing AS and driving the equilibrium among these forms towards AS. The goal is to assess the effect of this on the overall activity. Here we calculate the relative activity of the promoter, with and without the presence of the looped forms AF, AB and AS, as a function of three equilibrium constants:

1.  $K_B$ , the equilibrium constant between UF and UB
2. X, the equilibrium constant between unlooped and looped forms, related to the value of  $\Delta G_{oct}$
3. Y, the equilibrium constant between AB and AS

It is assumed for simplicity that UB, AB and AS all have the same activity.

For the template that cannot loop, the fraction of active templates is

$$[\text{UB}] / ([\text{UB}] + [\text{UF}]) \quad (1)$$

For the template that can loop, the fraction of active templates is

$$([\text{UB}] + [\text{AB}] + [\text{AS}]) / ([\text{UB}] + [\text{AB}] + [\text{AS}] + [\text{UF}] + [\text{AF}]) \quad (2)$$

We express the concentrations of all species in terms of [UF]:

By definition, where [RNAP<sub>f</sub>] is the concentration of free RNAP:

$$K_B = [\text{UB}] / [\text{RNAP}_f] \cdot [\text{UF}]$$

$K_B$  is an association constant, with units of  $\text{M}^{-1}$ . Rearranging:

$$[\text{UB}] = [\text{UF}] \cdot (K_B \cdot [\text{RNAP}_f]) \quad (3)$$

$$[\text{AF}] = X \cdot [\text{UF}] \quad (4)$$

Where X, the equilibrium constant for this interconversion, is calculated from  $\Delta G_{\text{oct}}$  by

$K_{\text{oct}} = \exp(-\Delta G_{\text{oct}} / RT)$  where R is the gas constant and T is the temperature

$L = K_{\text{oct}} / (1 + K_{\text{oct}})$  where L is fraction looped

$$X = L / (1 - L)$$

$$[\text{AB}] = [\text{AF}] \cdot (K_B \cdot [\text{RNAP}_f])$$

$$[\text{AB}] = [\text{UF}] \cdot X \cdot (K_B \cdot [\text{RNAP}_f]) \quad (5)$$

$[\text{AS}] = Y \cdot [\text{AB}]$  where Y is equilibrium constant between AS and AB

$$[\text{AS}] = [\text{UF}] \cdot Y \cdot X \cdot (K_B \cdot [\text{RNAP}_f]) \quad (6)$$

For the looping case, the active fraction is given by (2):

$$([\text{UB}] + [\text{AB}] + [\text{AS}]) / ([\text{UB}] + [\text{AB}] + [\text{AS}] + [\text{UF}] + [\text{AF}])$$

Active species ( $[\text{UB}] + [\text{AB}] + [\text{AS}]$ ) are given by substituting (3), (5) and (6):

$$\begin{aligned} & [\text{UF}] \cdot (K_B \cdot [\text{RNAP}_f] + X \cdot K_B \cdot [\text{RNAP}_f] + X \cdot Y \cdot K_B \cdot [\text{RNAP}_f]) \\ & = [\text{UF}] \cdot K_B \cdot [\text{RNAP}_f] \cdot (1 + X + X \cdot Y) \end{aligned}$$

Total species also include UF and AF (from (4)):

$$[\text{UF}] \cdot K_B \cdot [\text{RNAP}_f] \cdot (1 + X + X \cdot Y) + [\text{UF}] + [\text{UF}] \cdot X$$

After cancelling [UF], the ratio, giving the active fraction of templates, is

$$K_B \cdot [\text{RNAP}_f] \cdot (1 + X + X \cdot Y) / \{1 + X + K_B \cdot [\text{RNAP}_f] \cdot (1 + X + X \cdot Y)\} \quad (7)$$

For the unlooped case, the active fraction is given by (1):

$$[\text{UB}] / ([\text{UB}] + [\text{UF}])$$

$$\begin{aligned}
&= [\text{UF}] \cdot (K_B \cdot [\text{RNAP}_f]) / \{ [\text{UF}] + [\text{UF}] \cdot (K_B \cdot [\text{RNAP}_f]) \} \\
&= (K_B \cdot [\text{RNAP}_f]) / (1 + K_B \cdot [\text{RNAP}_f]) \tag{8}
\end{aligned}$$

The desired result is the ratio Z, which represents the fold stimulation by looping:

Z = activity of the looped template / activity of unlooped template. Canceling terms,

$$Z = \langle (1 + X + X \cdot Y) / \{1 + X + K_B \cdot [\text{RNAP}_f] \cdot (1 + X + X \cdot Y)\} \rangle / \langle 1 / (1 + K_B \cdot [\text{RNAP}_f]) \rangle$$

Rearranging,

$$Z = \{(1 + X + X \cdot Y) (1 + K_B \cdot [\text{RNAP}_f])\} / \{1 + X + K_B \cdot [\text{RNAP}_f] \cdot (1 + X + X \cdot Y)\} \tag{9}$$

This equation was solved numerically for several values of  $\Delta G_{\text{oct}}$  (which yields X) and a range of Y values, calculating the value in each case of  $K_B \cdot [\text{RNAP}_f]$  that gave a value of Z of 1.6 (representing the  $P_{\text{RM}}^+$  case) or 5 (representing the *prm240* case). See Fig. S5.

## F. Possible effects of supercoiling

Although the loop is usually depicted as a simple structure (Figs. 1 and 8, Main Text), in fact the DNA is probably supercoiled much or most of the time. We first discuss the forms taken by supercoiled DNA *in vitro*, and presumably in the cell, then we address the possible consequences for the  $\lambda$  system in light of our findings.

Supercoiled DNA forms a plectonemic superhelix (Fig. 8B left), in which a segment of duplex DNA forms a loop with the two arms intertwined (10). Rapid sliding of the two arms with respect to one another (arrows in figure), juxtaposes a given site on one helix with many sites on the opposite helix, raising their effective local concentration roughly 100-fold relative to that on relaxed DNA (10). This “slithering” should favor octamer formation (Fig. 8B right).

When DNA is transcribed, the moving RNAP follows a helical path around the helix axis (11). If the DNA is free to rotate, it can do so. If the DNA is fixed in a loop, however, it cannot rotate to any extent. In this case, the RNAP can rotate about the DNA, but, due to coupled transcription and translation in prokaryotes, as the mRNA grows it becomes increasingly bulky, and rotation becomes more difficult. More importantly, as RNAP moves, it pushes positive supercoils ahead of itself, and negative supercoils arise in its wake (11, 12). On looped DNA, this would quickly disrupt the superhelix. In addition, the negative supercoils behind the RNAP should facilitate subsequent open complex formation.



Consider now the forms of the DNA segment between  $\lambda$   $O_L$  and  $O_R$ . If the DNA is relaxed, the flexibility of DNA allows either the parallel or anti-parallel form. However, if the DNA is in a superhelix prior to CI-mediated loop formation, this should greatly favor the anti-parallel orientation (Fig. 8B right).

When this segment is transcribed, RNAP initiating at  $P_{RM}$  transcribes nearly the entire region contained in the loop. If the DNA is unlooped, transcription might affect supercoiling locally, but the supercoils would not affect the overall structure of the segment. If the DNA is looped (Fig. 8B right), transcription will disrupt the superhelix, and we assume for simplicity that such disruption will occur at any time that an RNAP is transcribing the  $P_{RM}$  mRNA.

To estimate roughly the fraction of the time this interval is being transcribed, we assume for the moment that transcription is a Poisson process—that is, that the likelihood of an initiation is constant. The transcript is  $\sim 2.2$  kb long; if RNAP moves at 30 bp/sec, a transcript is made in  $\sim 70$  sec. The value of  $k_f$  on unlooped  $P_{RM}$  *in vitro* is 0.012/sec (13); once formed, open complexes generally initiate promptly. We assume for the sake of discussion that CI-mediated looping does not alter  $k_f$  (as in the  $K_B$  model). Upon initiation, transcription lasts for the next 70 sec. We can set a lower limit on the probability that no initiation will occur in this 70-sec interval by assuming that the promoter is nearly always occupied by RNAP, an assumption compatible with the  $K_B$  model, which posits that looping favors RNAP binding (see Main Text). In this case, the probability that no initiation will occur in the next sec is  $1 - k_f = 0.988$ , and the probability that another initiation will not occur during synthesis of a transcript is  $0.988^{70}$  or  $\sim 0.4$ . This value represents the probability that the region will become non-transcribing when a newly-initiated transcript terminates. It is also the probability that on a non-transcribing template the region will remain non-transcribing for the next 70 sec. If the promoter is free of RNAP a substantial fraction of time, this probability would be larger. In any case, it is plausible that the region exists both in transcribed and non-transcribed states a substantial fraction of the time.

Recent *in vivo* data, including some with a form of  $P_{RM}$  that can loop, indicate that initiation is not in fact a Poisson process. Instead, transcription occurs in “bursts” (14, 15); periods of active transcription are interspersed with long periods in which no transcription occurs. For  $P_{RM}$ , the burst size is  $\sim 4$  transcripts. Accordingly, the fraction of time the interval is not being transcribed is larger than the above calculation indicates.

We now relate these considerations to the present findings. First, supercoiling favors the anti-parallel form (Fig. 8B right). However, when the DNA is being transcribed, if the loop breaks and reforms, the anti-parallel form should be much less favored, since the superhelix is disrupted by transcription. If loops form and break rapidly, this might lead to a sizable percentage of the loops in parallel orientation, perhaps as much as 50%. This predicts that, if the  $O_L$  region were placed upstream of  $P_{RM}$ , so that transcription would not disrupt the superhelix, the anti-parallel form would continue to be favored. In contrast, Cui *et al.* (16) found that the degree of stimulation was the same regardless of the orientation of the  $O_L$  region, suggesting either that both parallel and anti-parallel forms are stimulated about equally, and/or that both forms are about equally probable on their templates.

Second, if the promoter is weaker, as with *prm240*, the fraction of time that the interval is supercoiled increases, further favoring the anti-parallel conformation. This suggests one mechanism by which *prm240* could be stimulated by looping to a greater extent than  $P_{RM}^+$ , although it is probably not the only mechanism (see Main Text).

Third, there are two IHF binding sites in the  $O_L$  region (17-19). In addition to the site studied here, a second, less well-defined site (termed L2) lies close to the  $T_{imm}$  terminator. Bends created by IHF might affect the relative probability of the two looped orientations of  $O_L$  and  $O_R$ ; for simplicity we suggest that the two bends offset one another, with the net effect that the anti-parallel orientation of the  $O_L$  region is preferred. If so, then blocking binding of IHF to the L1 site would disfavor the anti-parallel conformation, leading to a loss of stimulation. Such an effect would be more severe for *prm240*, if, the mutant template is supercoiled a greater fraction of the time. This fits with the lack of stimulation in the *IHFmut prm240* case (Fig. 3C and 3D). In contrast, the wild-type would be less affected, as observed (Fig. 3A and 3B).

Fourth, because of the creation of negative supercoils behind the advancing RNAP, transcription would favor open complex formation by the next RNAP. This would offer a simple mechanism for bursting, if supercoils do not relax before subsequent initiations occur, as suggested (20). This effect would be greater in a looped complex, because relaxation of negative supercoils would be much slower, and might contribute to the bursting seen with  $P_{RM}$  (14, 15).

Evaluating the impact of supercoiling is made still more difficult by other uncertainties regarding CI-mediated looping. The rates at which the loop forms and dissociates are unknown.

Can a loop persist through several transcription events? Does the  $\alpha$ CTD-UP element interaction make an anti-parallel loop last longer? Conversely, might transcription initiation destabilize the loop by putting torque on the DNA?

### References Cited

1. **Michalowski CB, Short MD, Little JW.** 2004. Sequence tolerance of the phage  $\lambda$   $P_{RM}$  promoter: Implications for evolution of gene regulatory circuitry. *J. Bacteriol.* **186**:7988-7999.
2. **Atsumi S, Little JW.** 2004. Regulatory circuit design and evolution using phage  $\lambda$ . *Genes Dev.* **18**:2086-2094.
3. **Sanger F, Coulson AR, Hong GF, Hill DF, Petersen GB.** 1982. Nucleotide sequence of bacteriophage  $\lambda$  DNA. *J.Mol.Biol.* **162**:729-773.
4. **Giese KC, Michalowski CB, Little JW.** 2008. RecA-dependent cleavage of LexA dimers. *J Mol.Biol.* **377**:148-161.
5. **Little JW, Michalowski CB.** 2010. Stability and instability in the lysogenic state of phage lambda. *J. Bacteriol.* **192**:6064-6076.
6. **Zissler J, Signer E, Schaefer F.** 1971. The role of recombination in growth of bacteriophage lambda I. The gamma gene, p. 455-468. *In Hershey AD (ed.), The Bacteriophage Lambda.* Cold Spring Harbor Laboratory.
7. **Enquist LW, Skalka A.** 1973. Replication of bacteriophage  $\lambda$  DNA dependent on the function of host and viral genes I. Interaction of *red*, *gam* and *rec*. *J.Mol.Biol.* **75**:185-212.
8. **Takeda Y, Sarai A, Rivera VM.** 1989. Analysis of the sequence-specific interactions between Cro repressor and operator DNA by systematic base substitution experiments. *Proc.Natl.Acad.Sci.U.S.A.* **86**:439-443.
9. **Degnan PH, Michalowski CB, Babić AC, Cordes MHJ, Little JW.** 2007. Conservation and diversity in the immunity regions of wild phages with the immunity specificity of phage  $\lambda$ . *Mol. Microbiol.* **64**:232-244.
10. **Vologodskii AV, Levene SD, Klenin KV, Frank-Kamenetskii M, Cozzarelli NR.** 1992. Conformational and thermodynamic properties of supercoiled DNA. *J.Mol.Biol.* **227**:1224-1243.
11. **Liu LF, Wang JC.** 1987. Supercoiling of the DNA template during transcription. *Proc.Natl.Acad.Sci.U.S.A.* **84**:7024-7027.
12. **Wu HY, Shyy S, Wang JC, Liu LF.** 1988. Transcription generates positively and negatively supercoiled domains in the template. *Cell* **53**:433-440.
13. **Shih MC, Gussin GN.** 1983. Mutations affecting two different steps in transcription initiation at the phage  $\lambda$   $P_{RM}$  promoter. *Proc.Natl.Acad.Sci.U.S.A.* **80**:496-500.

14. **Golding I, Paulsson J, Zawilski SM, Cox EC.** 2005. Real-time kinetics of gene activity in individual bacteria. *Cell* **123**:1025-1036.
15. **So L, Ghosh A, Zong C, Sepúlveda LA, Segev R, Golding I.** 2011. General properties of transcriptional time series in *Escherichia coli* *Nat.Genet.* **43**:554-560.
16. **Cui L, Murchland I, Shearwin KE, Dodd IB.** 2013. Enhancer-like long-range transcriptional activation by  $\lambda$  CI-mediated DNA looping. *Proc.Natl.Acad.Sci.U.S.A* **110**:2922-2927.
17. **Giladi H, Koby S, Prag G, Engelhorn M, Geiselmann J, Oppenheim AB.** 1998. Participation of IHF and a distant UP element in the stimulation of the phage  $\lambda$  P<sub>L</sub> promoter. *Mol. Microbiol.* **30**:443-451.
18. **Giladi H, Murakami K, Ishihama A, Oppenheim AB.** 1996. Identification of an UP element within the IHF binding site at the P<sub>L1</sub>-P<sub>L2</sub> tandem promoter of bacteriophage  $\lambda$ . *J.Mol.Biol.* **260**:484-491.
19. **Giladi H, Gottesman M, Oppenheim AB.** 1990. Integration host factor stimulates the phage lambda pL promoter. *J.Mol.Biol.* **213**:109-121.
20. **Mitarai N, Dodd IB, Crooks MT, Sneppen K.** 2008. The generation of promoter-mediated transcriptional noise in bacteria. *PLoS.Comput.Biol.* **4**:e1000109.
21. **Little JW.** 1984. Autodigestion of *lexA* and phage lambda repressors. *Proc.Natl.Acad.Sci.U.S.A.* **81**:1375-1379.
22. **Little JW, Shepley DP, Wert DW.** 1999. Robustness of a gene regulatory circuit. *EMBO J.* **18**:4299-4307.
23. **Atsumi S, Little JW.** 2006. Role of the lytic repressor in prophage induction of phage  $\lambda$  as analyzed by a module-replacement approach. *Proc.Natl.Acad.Sci.U.S.A.* **103**:4558-4563.
24. **Simons RW, Houman F, Kleckner N.** 1987. Improved single and multicopy *lac*-based cloning vectors for protein and operon fusions. *Gene* **53**:85-96.
25. **Mustard JA, Little JW.** 2000. Analysis of *Escherichia coli* RecA interactions with LexA, lambda CI, and UmuD by site-directed mutagenesis of *recA*. *J. Bacteriol.* **182**:1659-1670.
26. **Krause M, Rückert B, Lurz R, Messer W.** 1997. Complexes at the replication origin of *Bacillus subtilis* with homologous and heterologous DnaA protein. *J.Mol.Biol.* **274**:365-380.
27. **Whipple FW, Kuldell NH, Cheatham LA, Hochschild A.** 1994. Specificity determinants for the interaction of  $\lambda$  repressor and P22 repressor dimers. *Genes Dev.* **8**:1212-1223.
28. **Little JW, Hill SA.** 1985. Deletions within a hinge region of a specific DNA-binding protein. *Proc.Natl.Acad.Sci.U.S.A.* **82**:2301-2305.
29. **Lin LL, Little JW.** 1989. Autodigestion and RecA-dependent cleavage of Ind<sup>-</sup> mutant LexA proteins. *J.Mol.Biol.* **210**:439-452.
30. **Beamer LJ, Pabo CO.** 1992. Refined 1.8 Å crystal structure of the  $\lambda$  repressor-operator complex. *J.Mol.Biol.* **227**:177-196.
31. **Rice PA, Yang SW, Mizuuchi K, Nash HA.** 1996. Crystal structure of an IHF-DNA complex: A protein-induced DNA U-turn. *Cell* **87**:1295-1306.
32. **Sayle R, Milner-White EJ.** 1995. RasMol: Biomolecular graphics for all. *Trends in Biochemical Sciences* **20**:374-374.

**TABLE S1. BACTERIAL, PHAGE AND PLASMID STRAINS**

| Strain                            | Relevant genotype                                                                                                                                                                                                                                | Source or reference |
|-----------------------------------|--------------------------------------------------------------------------------------------------------------------------------------------------------------------------------------------------------------------------------------------------|---------------------|
| a. Bacterial strains <sup>a</sup> |                                                                                                                                                                                                                                                  |                     |
| JL468                             | AB1157 / F' <i>lacI<sup>q</sup></i>                                                                                                                                                                                                              | (21)                |
| JL5242                            | Derivative of JL2497 with F' <i>lacI<sup>q</sup>lacZΔM15::Tn3</i> replacing F' <i>lacI<sup>q</sup>lacZΔM15::Tn9</i>                                                                                                                              | (2) <sup>b</sup>    |
| JL5292                            | JL468 / pA3B2                                                                                                                                                                                                                                    | This work           |
| JL5830                            | JL468 / pJWL326                                                                                                                                                                                                                                  |                     |
| JL5832                            | JL468 / pJWL327                                                                                                                                                                                                                                  | This work           |
| JL5895                            | JL5242 / pA3B2                                                                                                                                                                                                                                   | (2)                 |
| JL5932                            | JL2497 (λJL163)                                                                                                                                                                                                                                  | (22)                |
| JL6112                            | JL5902(λJL240)                                                                                                                                                                                                                                   | (5)                 |
| JL6142                            | JL2497 Δ( <i>lacIPOZYA</i> ) F <sup>-</sup>                                                                                                                                                                                                      | (2)                 |
| JL7022                            | JL468/pJWL521                                                                                                                                                                                                                                    | This work           |
| JL7209                            | JL5292 / pJWL808                                                                                                                                                                                                                                 | This work           |
| JL7937                            | JL6142 / pJWL614                                                                                                                                                                                                                                 | This work           |
| JL8524                            | JL2497 (λJL1383)                                                                                                                                                                                                                                 | This work           |
| JL9058                            | DH5α / pJAM13                                                                                                                                                                                                                                    | This work           |
| JL9114                            | JL5832 / pJWL1293                                                                                                                                                                                                                                | This work           |
| JL9115                            | JL5832 / pJWL1294                                                                                                                                                                                                                                | This work           |
| JL9116                            | JL5832 / pJWL1295                                                                                                                                                                                                                                | This work           |
| JL9121                            | JL2497 (λJL1646)                                                                                                                                                                                                                                 | This work           |
| JL9311                            | JL2497 (λJL1680)                                                                                                                                                                                                                                 | This work           |
| JL9314                            | JL2497 (λJL1682)                                                                                                                                                                                                                                 | This work           |
| JL9341                            | JL2497 (λJL1647)                                                                                                                                                                                                                                 | This work           |
| DH5α                              | Δ( <i>lacZYA-argF</i> )U169 <i>recA1 endA1 hsdR17</i> (r <sub>K</sub> <sup>-</sup> m <sub>K</sub> <sup>+</sup> ) <i>phoA supE44 thi-1 gyrA96 relA1</i> (φ80 <i>lacZΔM15</i> ). Used for high-efficiency transformation of SDM ligation mixtures. | Invitrogen          |

| b. Phage strains <sup>c</sup> |                                                                                                                                                         |          |           |
|-------------------------------|---------------------------------------------------------------------------------------------------------------------------------------------------------|----------|-----------|
| λJL163                        | λ <i>bor::kan</i> , used as wild-type λ ; remaining λ strains are derivatives of this strain <sup>a</sup>                                               |          | (22)      |
| λJL240                        | λ <i>prm240</i>                                                                                                                                         |          | (5)       |
| λJL481                        | λ <i>lacO</i> / $P_L O_R^+$                                                                                                                             |          | This work |
| λJL483                        | λ <i>lacO</i> / $P_L prm240$                                                                                                                            |          | This work |
| λJL489                        | λ <i>lacO</i> / $P_L v1 v3$                                                                                                                             |          | This work |
| λJL537                        | λ <i>v2 v1 v3</i>                                                                                                                                       |          | (5)       |
| λJL1646                       | λ <i>IHFmut</i>                                                                                                                                         |          | This work |
| λJL1647                       | λ $\Delta UP$                                                                                                                                           |          | This work |
| λJL1383                       | λ <i>cI857ts</i>                                                                                                                                        |          | This work |
| λJL1680                       | λ <i>cI857ts IHFmut</i>                                                                                                                                 |          | This work |
| λJL1682                       | λ <i>cI857ts ΔUP</i>                                                                                                                                    |          | This work |
|                               |                                                                                                                                                         |          |           |
|                               | c. Plasmids                                                                                                                                             | Vector   |           |
| pJWL326                       | Derivative of pLR1 with <i>lacP::cI857ts</i>                                                                                                            | pBR322   | This work |
| pJWL327                       | Derivative of pA3B2 with <i>lacP::cI857ts</i>                                                                                                           | pACYC184 | This work |
| pJWL334                       | Derivative of pBS(-) with modified polylinker. Amp <sup>R</sup> ; high copy-number                                                                      | pBS(-)   | (1)       |
| pJWL487                       | Derivative of pJWL334; carries λ $O_R$ region with <i>prm240</i> allele                                                                                 | pBS(-)   | (5)       |
| pJWL521                       | Derivative of pBR322 with truncated <i>cI857</i> gene                                                                                                   | pBR322   | This work |
| pJWL614                       | <i>lacI<sup>q</sup></i> Amp <sup>R</sup> ; medium copy-number                                                                                           | pBR322   | (23)      |
| pJWL611                       | Derivative of pRS308 lacking <i>lacA</i> and most of <i>lacY</i> , with multiple cloning site and <i>trp a</i> located distal to the end of <i>lacZ</i> | pBR322   | (24); (1) |
| pJWL631                       | Derivative of pJWL334; carries wild-type λ $O_R$ region                                                                                                 | pBS(-)   | (5)       |
| pJWL808                       | Derivative of pJWL334; carries λ $O_L$ region with <i>lacO</i> at $P_L$ (see Text)                                                                      | pBS(-)   | (2)       |
| pJWL1157                      | λ $O_L$ region cloned into pJWL611                                                                                                                      | pBR322   | (5)       |
| pJWL1158                      | $O_L3-4$ derivative of pJWL1157                                                                                                                         | pBR322   | (5)       |
| pJWL1293                      | Derivative of pJWL334; carries λ $O_L$ region                                                                                                           | pBS(-)   | This work |
| pJWL1294                      | Derivative of pJWL334; carries λ $O_L$ region with                                                                                                      | pBS(-)   | This work |

|          |                                                                                                                                       |        |                   |
|----------|---------------------------------------------------------------------------------------------------------------------------------------|--------|-------------------|
|          | <i>IHFmut</i>                                                                                                                         |        |                   |
| pJWL1295 | Derivative of pJWL334; carries $\lambda$ $O_L$ region with $\Delta UP$                                                                | pBS(-) | This work         |
| pJAM13   | lacP:: <i>cI</i>                                                                                                                      | pGB2   | (25)              |
| pLEXInt  | Carries <i>lacI</i> and $\lambda$ <i>int</i> gene fused to the IPTG-inducible $P_{A1-O3/O4}$ promoter in pLEX5BA                      | pBR322 | Anca Segall       |
| pLEX5BA  | Cloning vector; carries <i>lacI</i> and multiple cloning site downstream of IPTG-inducible, tightly-regulated $P_{A1-O3/O4}$ promoter | pBR322 | Anca Segall; (26) |
| pLR1     | Carries a weak <i>lacP&gt;::cI</i> fusion                                                                                             | pBR322 | (27)              |

<sup>a</sup> Not listed are derivatives of JL5932, JL8524, JL9121, JL9341, JL9311, and JL9314 carrying pLEXInt or the control plasmid pLEX5BA.

<sup>b</sup> F' *lacI<sup>f</sup>lacZ* $\Delta$ M15::*Tn3* was transferred from JL795 (28) to JL853 (29) with selection for Amp<sup>R</sup> and *tonA*, then to JL2497 with selection for Amp<sup>R</sup> and Str<sup>R</sup>. Used but not named in (2).

<sup>c</sup> All  $\lambda$  strains listed carry the *bor>::kan* allele

**Table S2. Intermediates for construction of  $P_{RM}::lacZ$  protein fusions**

| $O_L$ allele            | Template for SDM | Primers for SDM        | Resulting plasmid | Promoterless phage | $P_R::lacZ$ fusion |
|-------------------------|------------------|------------------------|-------------------|--------------------|--------------------|
| $\Delta UP$             | pJWL1157         | 105for, 85rev          | pJWL1279          | $\lambda$ JL1610   | $\lambda$ JL1620   |
| $\Delta UP O_L3-4$      | pJWL1279         | oL3mutf, oL3rev        | pJWL1297          | $\lambda$ JL1644   | $\lambda$ JL1651   |
| <i>IHFmut</i>           | pJWL1157         | 80for, 79mutrev        | pJWL1278          | $\lambda$ JL1609   | $\lambda$ JL1619   |
| <i>IHFmut O_L3-4</i>    | pJWL1278         | oL3IHF2X, oL3rev       | pJWL1296          | $\lambda$ JL1643   | $\lambda$ JL1650   |
| $\Delta(70-102)$        | pJWL1157         | IHF102for, IHF70rev    | pJWL1241          | $\lambda$ JL1530   | $\lambda$ JL1559   |
| $\Delta(70-102) O_L3-4$ | pJWL1158         | IHF102for, oL3mut70rev | pJWL1267          | $\lambda$ JL1551   | $\lambda$ JL1565   |
| $O_L1-3$                | pJWL1157         | oL1for, oL1mutrev      | pJWL1280          | $\lambda$ JL1611   | $\lambda$ JL1621   |
| $O_L1-3 O_L3-4$         | pJWL1280         | oL3mutf, oL3rev        | pJWL1298          | $\lambda$ JL1645   | $\lambda$ JL1652   |

**Table S3 – phages carrying  $P_{RM}::lacZ$  protein fusions with various  $O_L$  alleles distal to  $lacZ$**

| Phage strain name | $O_L$ allele            | $P_{RM}$ allele    | Source or reference |
|-------------------|-------------------------|--------------------|---------------------|
| λJL1366           | $T_{imm}$               | $P_{RM}^+$         | (5)                 |
| λJL1367           | $O_L^+$                 | $P_{RM}^+$         | (5)                 |
| λJL1370           | $O_L3-4$                | $P_{RM}^+$         | (5)                 |
| λJL1626           | $\Delta UP$             | $P_{RM}^+$         | This work           |
| λJL1654           | $\Delta UP O_L3-4$      | $P_{RM}^+$         | This work           |
| λJL1625           | $IHFmut$                | $P_{RM}^+$         | This work           |
| λJL1653           | $IHFmut O_L3-4$         | $P_{RM}^+$         | This work           |
| λJL1578           | $\Delta(70-102)$        | $P_{RM}^+$         | This work           |
| λJL1584           | $\Delta(70-102) O_L3-4$ | $P_{RM}^+$         | This work           |
| λJL1627           | $O_L1-3$                | $P_{RM}^+$         | This work           |
| λJL1655           | $O_L1-3 O_L3-4$         | $P_{RM}^+$         | This work           |
| λJL1394           | $T_{imm}$               | $P_{RM}^+ O_R3-r1$ | (5)                 |
| λJL1395           | $O_L^+$                 | $P_{RM}^+ O_R3-r1$ | (5)                 |
| λJL1396           | $O_L3-4$                | $P_{RM}^+ O_R3-r1$ | (5)                 |
| λJL1660           | $\Delta UP O_L3-4$      | $P_{RM}^+ O_R3-r1$ | This work           |
| λJL1703           | $IHFmut$                | $P_{RM}^+ O_R3-r1$ | This work           |
| λJL1659           | $IHFmut O_L3-4$         | $P_{RM}^+ O_R3-r1$ | This work           |
| λJL1675           | $\Delta(70-102) O_L3-4$ | $P_{RM}^+ O_R3-r1$ | This work           |
| λJL1674           | $O_L1-3$                | $P_{RM}^+ O_R3-r1$ | This work           |
| λJL1661           | $O_L1-3 O_L3-4$         | $P_{RM}^+ O_R3-r1$ | This work           |
| λJL1375           | $T_{imm}$               | $prm240$           | (5)                 |
| λJL1376           | $O_L^+$                 | $prm240$           | (5)                 |
| λJL1377           | $O_L3-4$                | $prm240$           | (5)                 |
| λJL1632           | $\Delta UP$             | $prm240$           | This work           |
| λJL1657           | $\Delta UP O_L3-4$      | $prm240$           | This work           |
| λJL1631           | $IHFmut$                | $prm240$           | This work           |
| λJL1656           | $IHFmut O_L3-4$         | $prm240$           | This work           |
| λJL1633           | $O_L1-3$                | $prm240$           | This work           |
| λJL1658           | $O_L1-3 O_L3-4$         | $prm240$           | This work           |
| λJL1585           | $\Delta(70-102)$        | $prm240$           | This work           |
| λJL1591           | $\Delta(70-102) O_L3-4$ | $prm240$           | This work           |
| λJL1391           | $T_{imm}$               | $prm240 O_R3-r1$   | (5)                 |
| λJL1392           | $O_L^+$                 | $prm240 O_R3-r1$   | (5)                 |
| λJL1393           | $O_L3-4$                | $prm240 O_R3-r1$   | (5)                 |
| λJL1663           | $\Delta UP O_L3-4$      | $prm240 O_R3-r1$   | This work           |
| λJL1662           | $IHFmut O_L3-4$         | $prm240 O_R3-r1$   | This work           |
| λJL1678           | $\Delta(70-102) O_L3-4$ | $prm240 O_R3-r1$   | This work           |
| λJL1677           | $O_L1-3$                | $prm240 O_R3-r1$   | This work           |
| λJL1664           | $O_L1-3 O_L3-4$         | $prm240 O_R3-r1$   | This work           |



**Table S4. Synthetic oligonucleotides used**

| Name        | Sequence                           |
|-------------|------------------------------------|
| IHF102for   | GCAGGGGGGCATTGTTTG                 |
| IHF70rev    | TAACCATCTGCGGTGATAAATT             |
| ol3mut70rev | TAACCAACTCTAGTGATAAATTAT           |
| IHF80for    | TTTTTATATGAATTTATTTTTTGCAG         |
| 79mutrev    | ACGTACAAACAACCATCTGCGGTG           |
| 105for      | GGGGGGCATTGTTTGGTA                 |
| 85rev       | TAAAAAACATACAGATAACCATCTG          |
| ol1mutfor   | TGATACTGAGCACATCAGCAG              |
| ol1mutrev   | ACTCCATTGGTATTTATGTCAACAC          |
| ol3IHF2X    | CACTAGAGTTGGTTGTTTGTACG            |
| ol3mutf     | CACTAGAGTTGGTTATCTGTATG            |
| ol3rev      | ATAAATTATCTCTGGCGGTGTTG            |
| olKpn       | CACGGTACCATCTGGATTCTCCTG 35357     |
| bamrexB     | GATGGATCCTGCATCCTTGTTTTCCAAC 35872 |

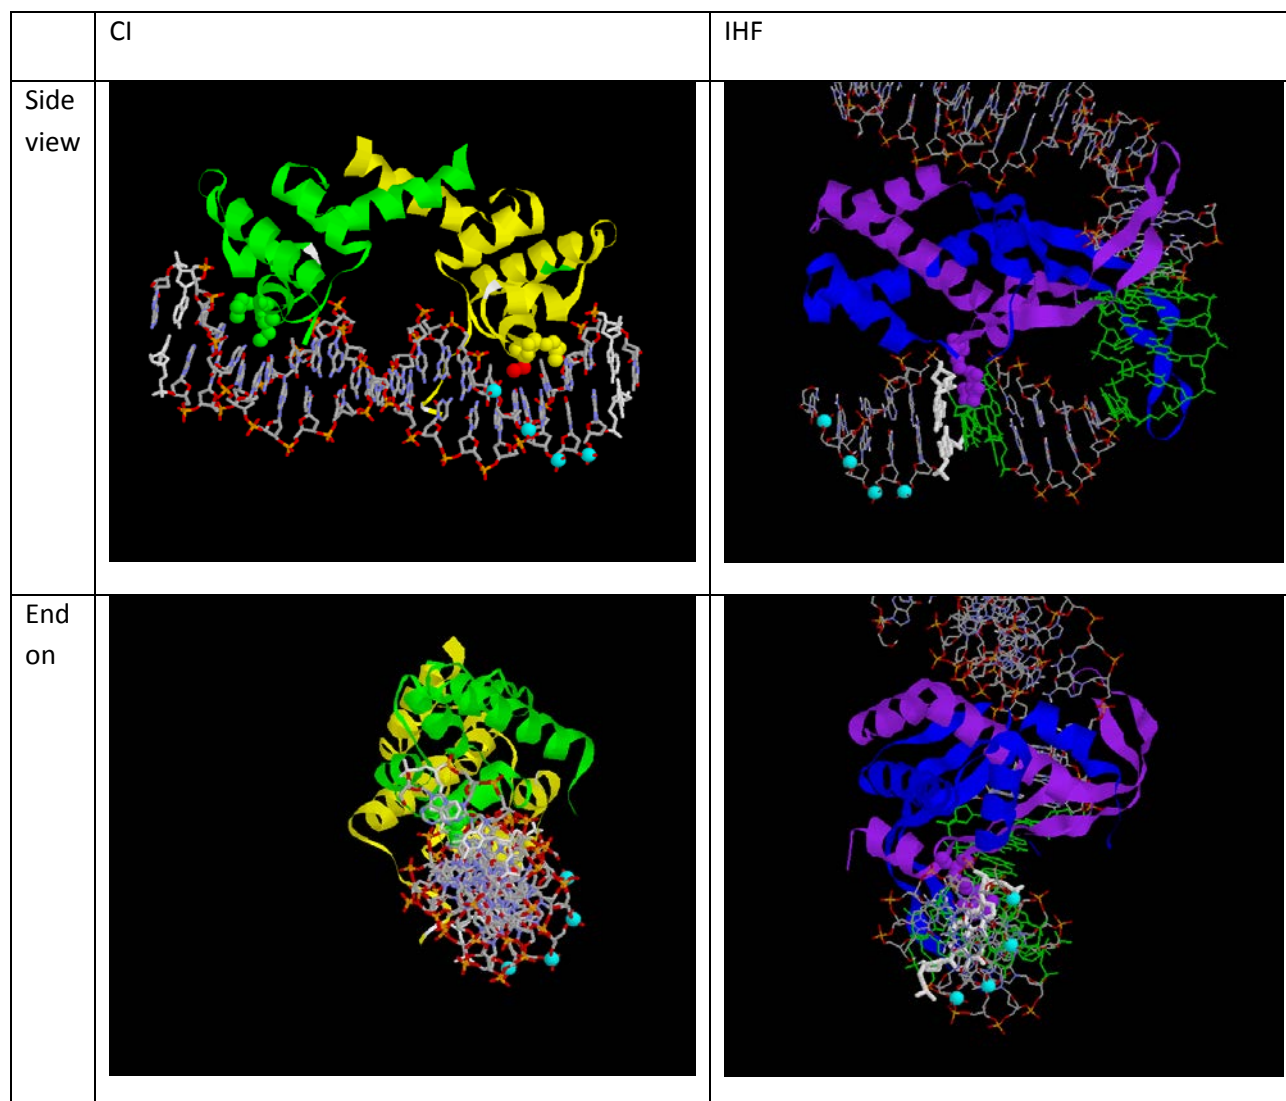

**Fig. S1. Clash between IHF and CI bound to  $O_L3$ .** Shown at left are structures of the CI N-terminal domain bound to  $O_L1$  (30) (1LMB.pdb); figures on the right show IHF bound to a specific site (31) (1IHF.pdb). In the CI structure, the two subunits are shown in green and yellow. In the side view (top left), if the specific binding site were  $O_L3$ , the IHF site would lie just to the right, and the white bp would correspond to bp -70. In the IHF structure (top right), the  $\alpha$  and  $\beta$  subunits are in blue and purple, respectively. Bases in green or white are the IHF binding site consensus, which which IHF makes specific contacts.  $O_L3$  would lie to the left, and the white bp corresponds to bp -70. This view is similar to that shown in (17). In each structure, the four phosphates in cyan are the same phosphates and are meant to help align the two structures visually. In each, the white base pair at bp -70 is an important IHF contact, which is changed in the *IHFmut* allele. The structures in the top panels are rotated  $90^\circ$  about the y axis to yield those in the bottom panels; taken together the figures indicate that the positions of the two proteins overlap, even in the absence of the CTD of CI, and they could not bind simultaneously to the DNA (see Fig. 6 in Main Text). Figures were generated using RasMol (32).

**Figure S2. Phage-by-plasmid crosses to place  $O_L$  alleles on phage**

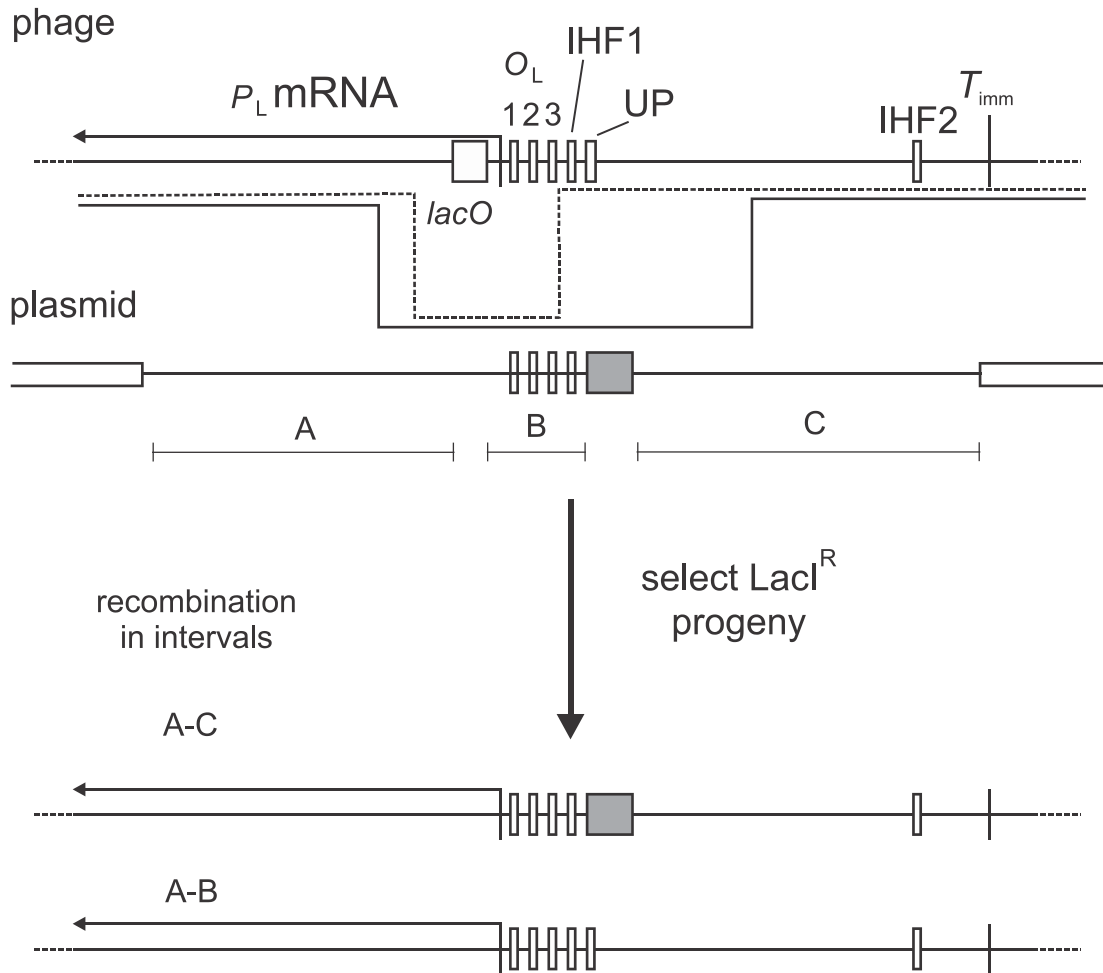

Recombination is between a  $lacO / P_L$  phage at the top and a plasmid bearing an allele of the  $O_L$  region, symbolized by a gray box.  $lacO$  is symbolized in the phage by the open box.  $LacI^R$  recombinants are generated by a first crossover in the interval marked "A"; the second crossover could occur in interval B (dashed line) or C (solid line), yielding the wild-type, recombinant A-B, or the desired recombinant A-C. These can be distinguished either by DNA sequencing of PCR products or (as in the present work), by their altered phenotype.

### Prophage induction of WT, IHFmut and $\Delta UP$ lysogens

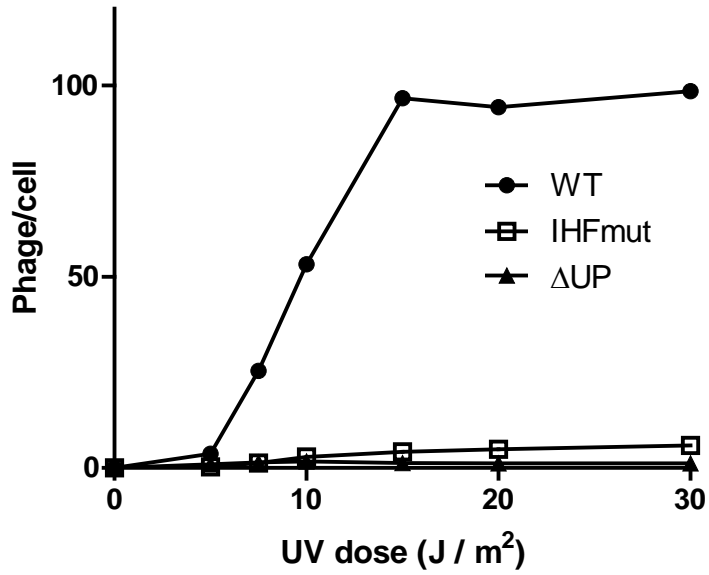

Figure S5

Fig. S3: **Prophage induction defect of  $\lambda$  IHFmut and  $\lambda$   $\Delta UP$ .** Prophage induction was carried out as described in Materials and Methods. Lysogens of  $\lambda$ JL163,  $\lambda$ JL1646 IHFmut and  $\lambda$ JL1647  $\Delta UP$  were irradiated with various doses of UV light, and the yield of phage was measured.

**Partial suppression of induction  
defect by supplying Int protein in *trans***

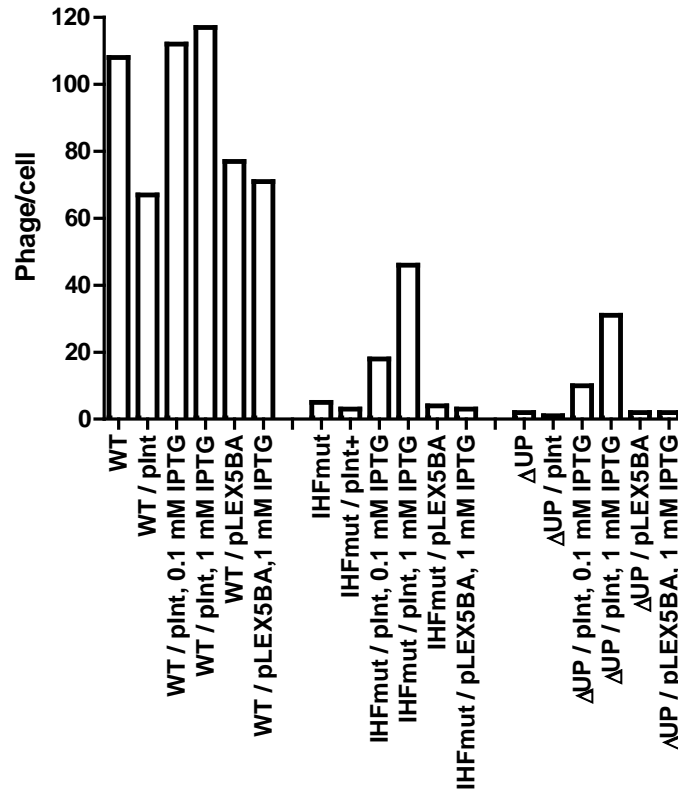

Figure S6

**Fig. S4: Partial suppression of induction defects of  $\lambda$  *IHFmut* and  $\lambda$  *ΔUP* by Int protein.**

The strains used in Fig S3 were transformed either with pLEXInt, which supplies Int under control of an IPTG-inducible promoter, or the pLEX5BA vector used to make pLEXInt as a control. Untransformed controls were also included. Cells were grown and UV-irradiated (20 J/m<sup>2</sup>) as described (22). After irradiation, aliquots were diluted 10-fold into medium containing 0, 0.1 or 1 mM IPTG and shaken 2 hr 37° C. Suppression is optimal when pInt is induced by 1 mM IPTG.

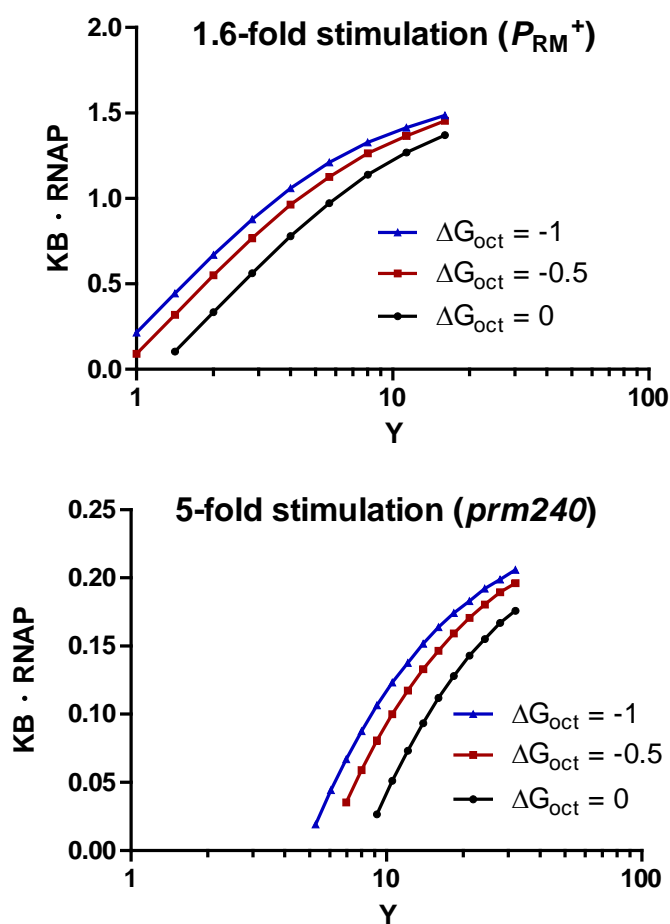

**Fig.S5: Analysis of  $K_B$  model.** For three values of  $\Delta G_{oct}$  and a range of  $Y$  values, equation (9) was solved for various values of  $K_B \cdot [RNAP_f]$ , and the values giving  $Z$  values (relative activation due to looping) of 1.6 or 5 were tabulated and plotted. These  $Z$  values correspond respectively to the maximal value of looping-mediated activation observed (Fig. 3) for  $P_{RM}^+$  and  $prm240$ . At low values of  $K_B \cdot [RNAP_f]$ , RNAP occupies the promoter in a closed complex only a small fraction of the time. For instance, values of 0.1, 0.3 and 1.0 correspond to 9%, 23% and 50% occupancy, respectively.  $K_B$  is believed to be substantially lower for  $prm240$  than for  $P_{RM}^+$  (see Main Text). It is plausible that the value of  $Y$  ( $= [AS]/[AB]$ ) differs for the two promoters, since the value may depend on the details of the conformation in the looped complex.
